# Supplementary material
Source: PubMed Central journal article supplement (PMC7485358)
Supplement: ONCO-25-793-s002.pdf [file ONCO-25-793-s002.pdf]

Supplemental Table for:  
Hepatitis B Surface Antigen Positivity is An Independent Unfavorable Prognostic Factor in Diffuse Large B-cell Lymphoma in The Rituximab Era  
Chieh-Lung Cheng et al.

**Table S1. Treatment response**

| Variables†          | HBsAg-positive       | HBsAg-negative        | P value |
|---------------------|----------------------|-----------------------|---------|
|                     | patients<br>(n = 98) | patients<br>(n = 318) |         |
| Overall response    | 75 (76.5)            | 272 (85.5)            | 0.043   |
| Complete remission  | 71 (72.4)            | 259 (81.4)            | 0.064   |
| Partial remission   | 4 (4.1)              | 13 (4.1)              | > 0.999 |
| Stable disease      | 2 (2)                | 0 (0)                 | 0.055   |
| Progressive disease | 16 (16.3)            | 32 (10.1)             | 0.104   |
| Induction death     | 3 (3.1)              | 12 (3.8)              | > 0.999 |
| Not evaluated       | 2 (2)                | 2 (0.6)               | 0.237   |

† number of patients (%)

**Table S2. Binary logistic regression analysis of clinical factors associated with overall response rate in patients with DLBCL**

| Predictors                   | Univariate analysis |             |         | Multivariate analysis* |             |         |
|------------------------------|---------------------|-------------|---------|------------------------|-------------|---------|
|                              | OR                  | 95% CI      | P value | OR                     | 95% CI      | P value |
| Age < 60 years               | 2.18                | 1.277–3.721 | 0.004   | 2.107                  | 1.193–3.721 | 0.01    |
| Female sex                   | 1.383               | 0.813–2.351 | 0.232   |                        |             |         |
| ECOG (< 2)                   | 1.846               | 0.749–4.552 | 0.183   |                        |             |         |
| Ann Arbor stage (stage I/II) | 2.74                | 1.552–4.838 | 0.001   | 2.033                  | 1.119–3.692 | 0.02    |
| Extranodal sites (< 2)       | 2.002               | 1.145–3.5   | 0.015   |                        |             |         |
| No BM involvement            | 1.378               | 0.687–2.762 | 0.367   |                        |             |         |
| No bulky lesion              | 1.791               | 0.831–3.859 | 0.137   |                        |             |         |
| No B symptoms                | 1.975               | 1.17–3.334  | 0.011   |                        |             |         |
| Normal LDH levels            | 2.337               | 1.358–4.024 | 0.002   |                        |             |         |
| Albumin ( $\geq$ 3.5 g/dL)   | 3.766               | 2.121–6.69  | <0.001  | 2.926                  | 1.607–5.327 | <0.001  |
| No hepatic impairment        | 2.002               | 1.085–3.694 | 0.026   |                        |             |         |
| ALC (> 1000/uL)              | 1.866               | 1.076–3.235 | 0.026   |                        |             |         |
| AMC (< 630/uL)               | 1.724               | 0.985–3.02  | 0.057   |                        |             |         |
| No HBsAg                     | 1.813               | 1.034–3.181 | 0.038   | 1.895                  | 1.033–3.478 | 0.039   |

\*Variables significantly associated with overall response rate in univariate analysis were selected for multivariate analysis using backward elimination method (Wald test).

Abbreviations: DLBCL, diffuse large B-cell lymphoma; OR, odds ratio; CI, confidence interval; ECOG, Eastern Cooperative Oncology Group; BM, bone marrow; LDH, lactate dehydrogenase; ALC, absolute lymphocyte count; AMC, absolute monocyte count; HBsAg, hepatitis B surface antigen.

**Table S3. Multivariate analysis of overall survival and progression-free survival in HBsAg-negative DLBCL patients with data of HBcAb (n = 229)**

| Variables          | Overall survival |              |                | Progression-free survival |             |                |
|--------------------|------------------|--------------|----------------|---------------------------|-------------|----------------|
|                    | HR               | 95% CI       | <i>P</i> value | HR                        | 95% CI      | <i>P</i> value |
| NCCN-IPI*          | 3.066            | 1.735–5.417  | < 0.001        | 1.834                     | 1.176–2.859 | 0.007          |
| Albumin†           | 1.374            | 0.761–2.48   | 0.292          | 1.779                     | 1.093–2.893 | 0.02           |
| HBcAb <sup>Δ</sup> | 1.493            | 0.792 –2.816 | 0.216          | 1.693                     | 1.01–2.839  | 0.046          |

\* High-intermediate/ high versus low/ low-intermediate

† Less than 3.5 g/dL versus more than or equal 3.5 g/dL

<sup>Δ</sup> HBcAb positivity versus HBcAb negativity

Abbreviations: HBsAg, hepatitis B surface antigen; DLBCL, diffuse large B-cell lymphoma; HBcAb, hepatitis B core antibody; HR, hazard ratio; CI, confidence interval; NCCN-IPI, National Comprehensive Cancer Network-International Prognostic Index.
